# Supplementary material
Source: PubMed Central journal article supplement (PMC2861772)
Supplement: NIHMS29098-supplement-1.pdf [file NIHMS29098-supplement-1.pdf]

## Supplementary Figure 1

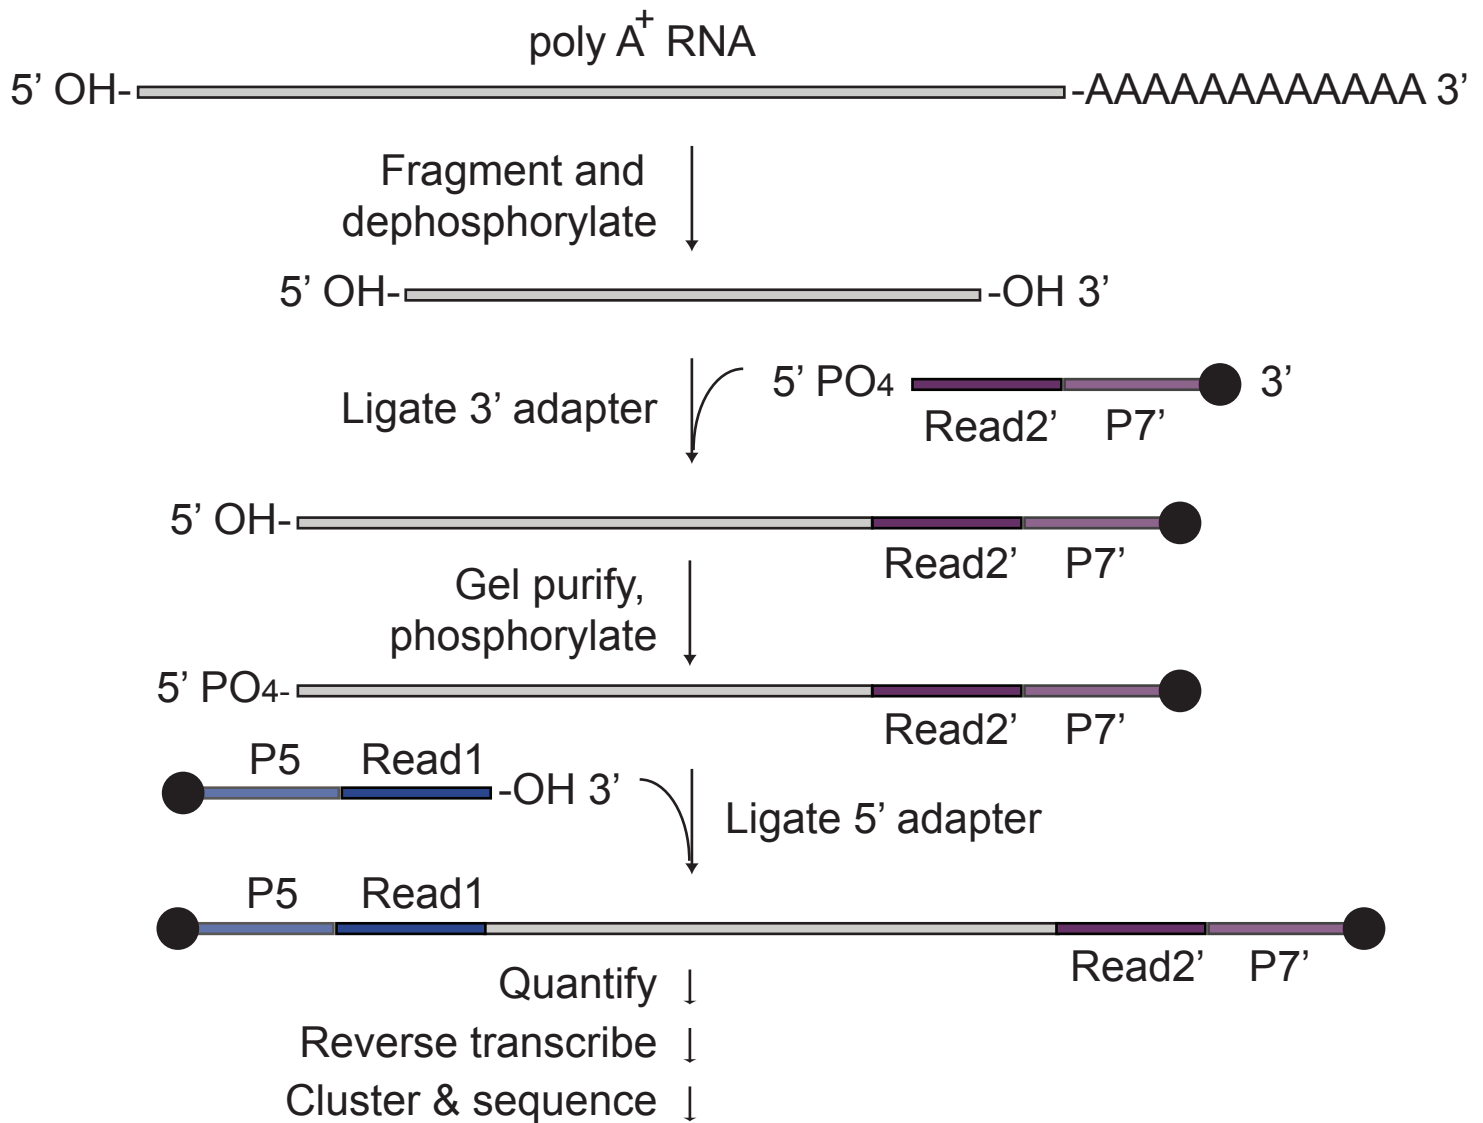

**Supplementary Figure 1. Library preparation for Flowcell RT libraries.** P5 and P7 are the oligonucleotide sequences present on the Illumina flowcell surface, and P7' is the reverse complementary sequence of P7. Read 1 corresponds to the nucleotide sequence of the Illumina read 1 sequencing primer, and Read 2' corresponds to the reverse complementary nucleotide sequence of the Illumina read 2 sequencing primer. Adapters possess blocking groups, indicated by a black circle, to prevent side reactions: the 3' adapter (red) has a 3' dideoxy cytosine, and the 5' adapter (blue) has an amino C6 modification at its 5' terminus.

## Supplementary Figure 2

a)

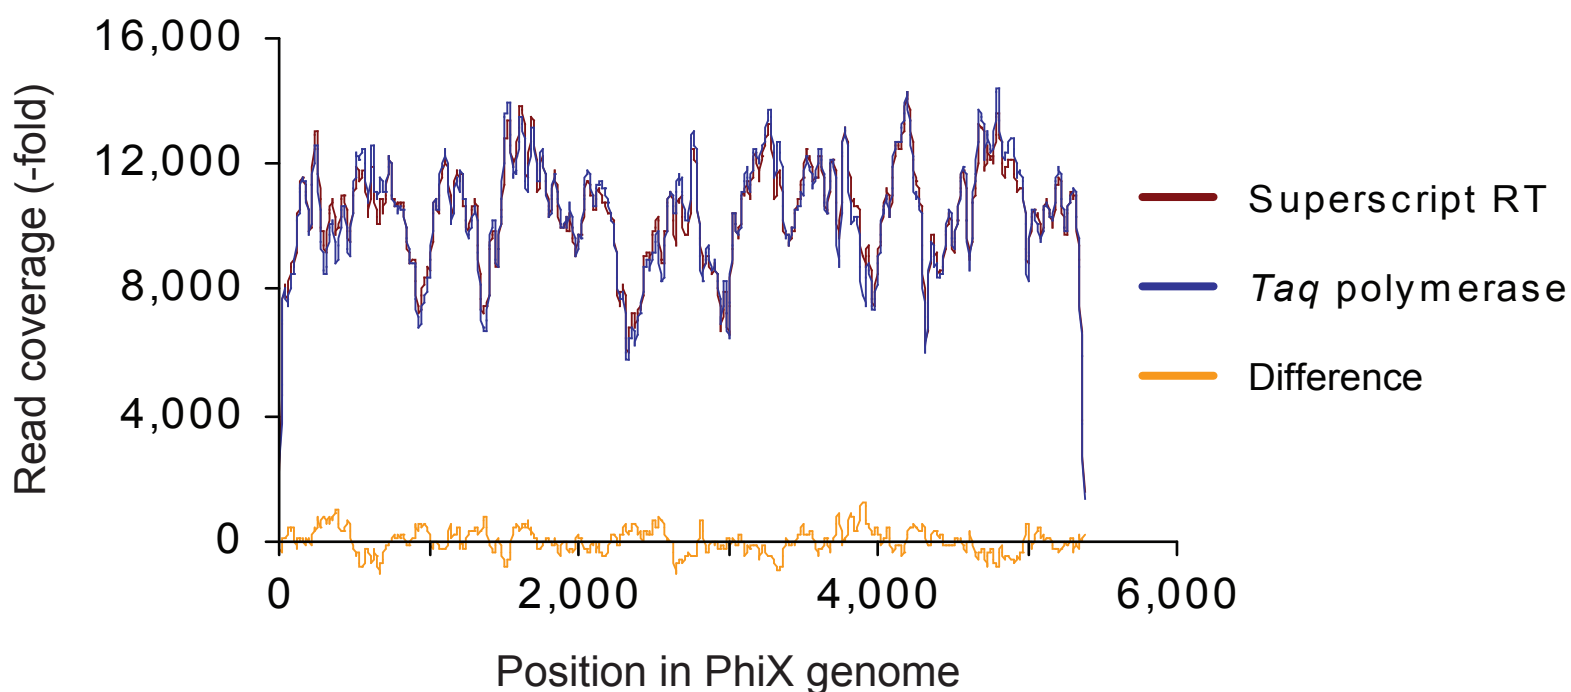

b)

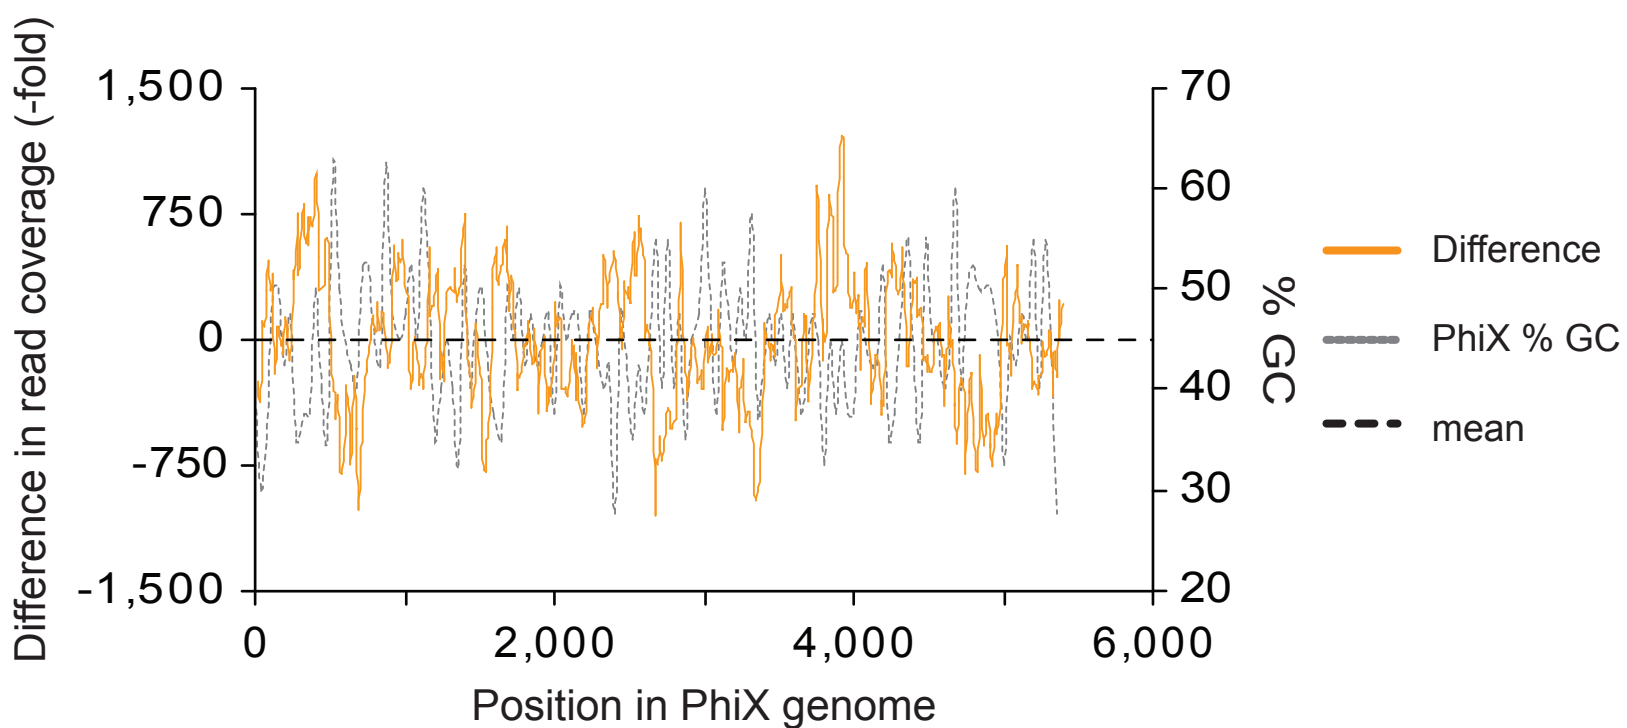

**Supplementary Figure 2. Cluster seeding with reverse transcriptase.** a) Normalized coverage plot of PhiX genome with 1st strand extension performed by Superscript Reverse Transcriptase (RT, red), Illumina-supplied Taq DNA polymerase (blue), and the difference between the two (light orange). The same aliquot of PhiX was used in each case, at the same loading concentration. Coverage is plotted in 10-base bins, using the first 37 bases of reads. b) An expanded version of the 'difference trace' is shown with % GC for the PhiX genome in 40-base bins superimposed. Spearman correlations were calculated for various bin sizes, with a 10-base shift between bins.

### Supplementary Figure 3

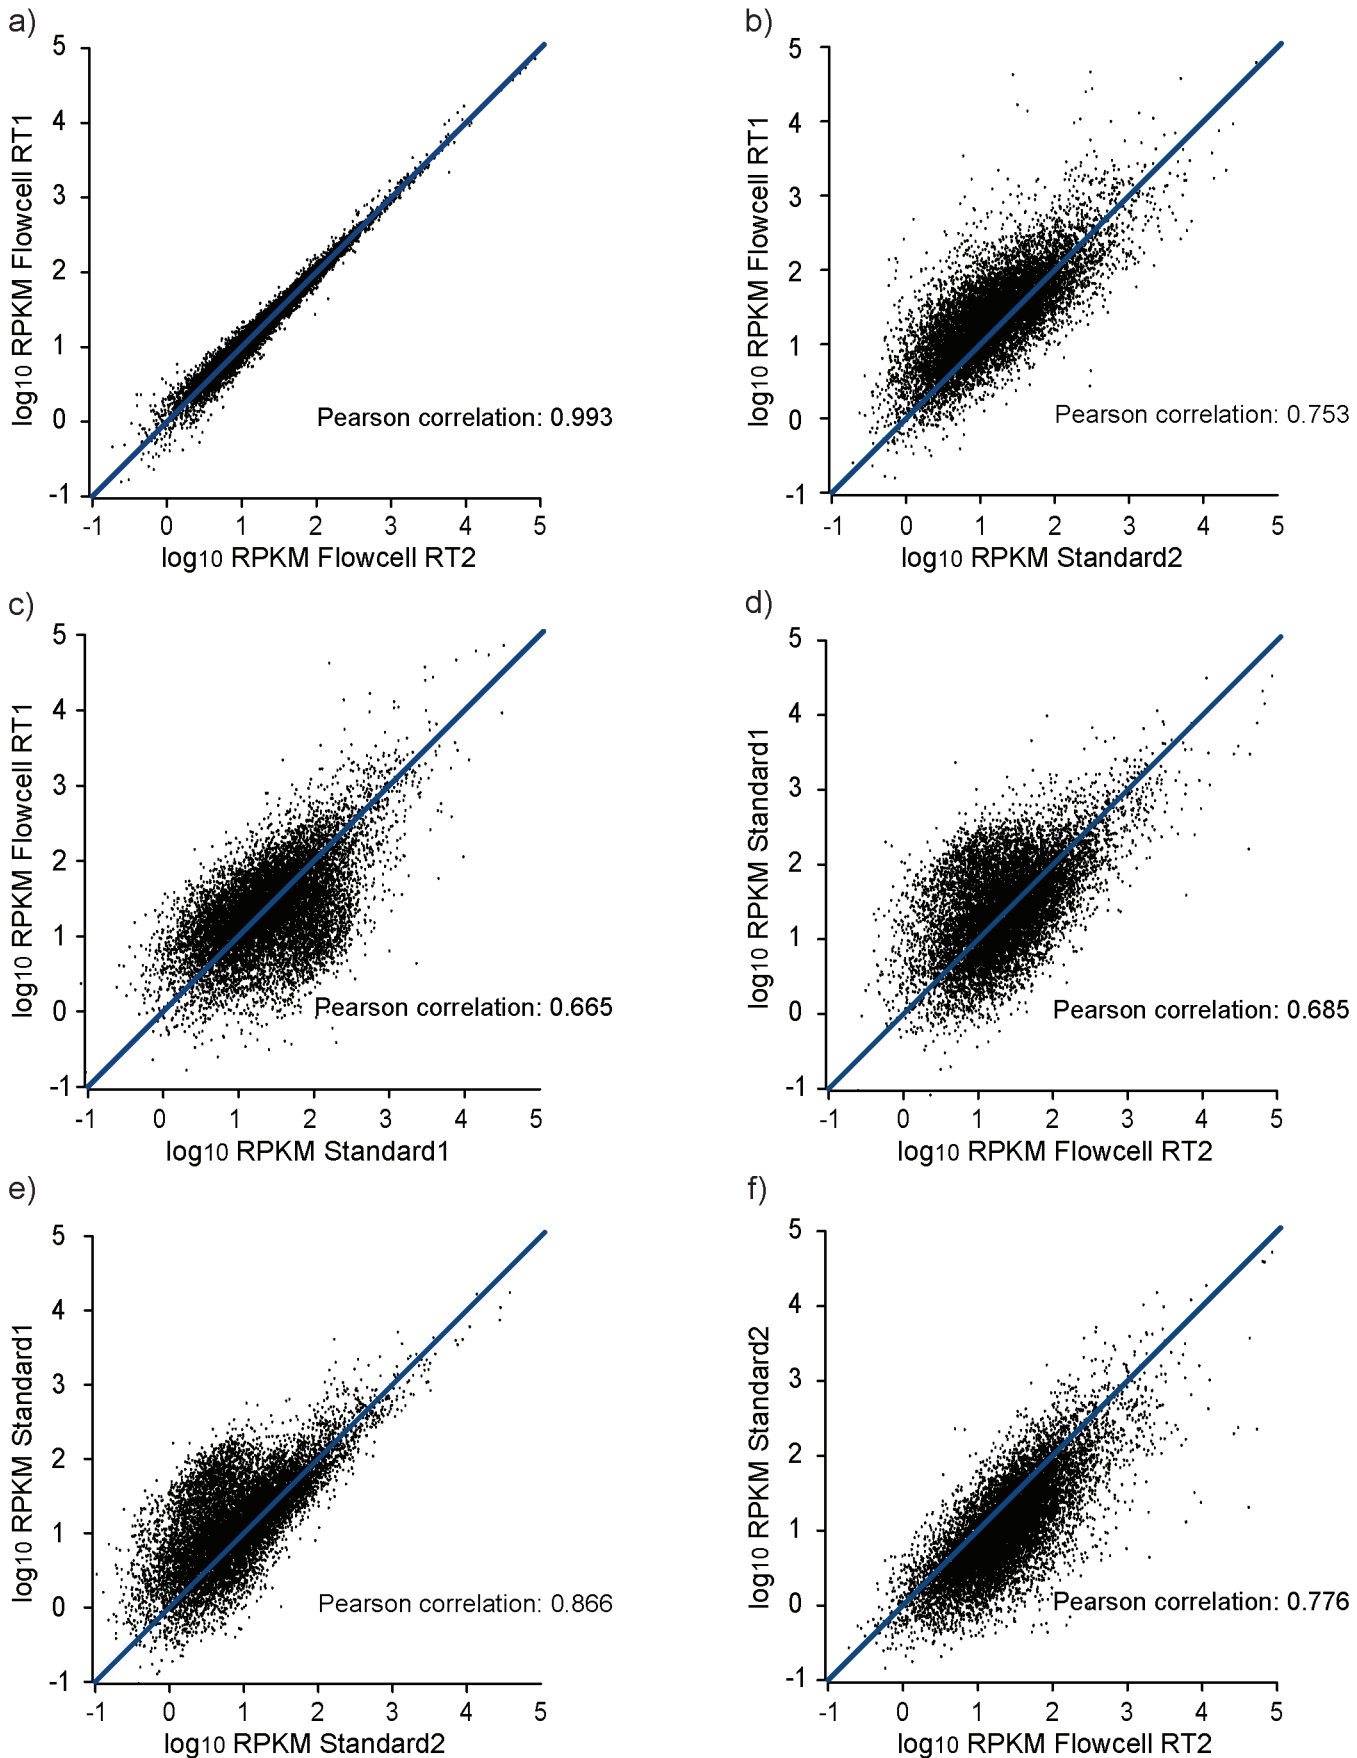

### Supplementary Figure 3. Correlation plots for FRT-seq and standard RNA-seq libraries.

To illustrate library reproducibility, we plotted sequence data obtained from all combinations of libraries. a) FRT1 against FRT2, b) FRT1 against STD2, c) FRT1 against STD1, d) STD1 against FRT2, e) STD1 against STD2, f) STD2 against FRT2. The blue line indicates perfect correlation. RPKM = reads per kilobase of sequence per million reads.

## Supplementary Figure 4

a)

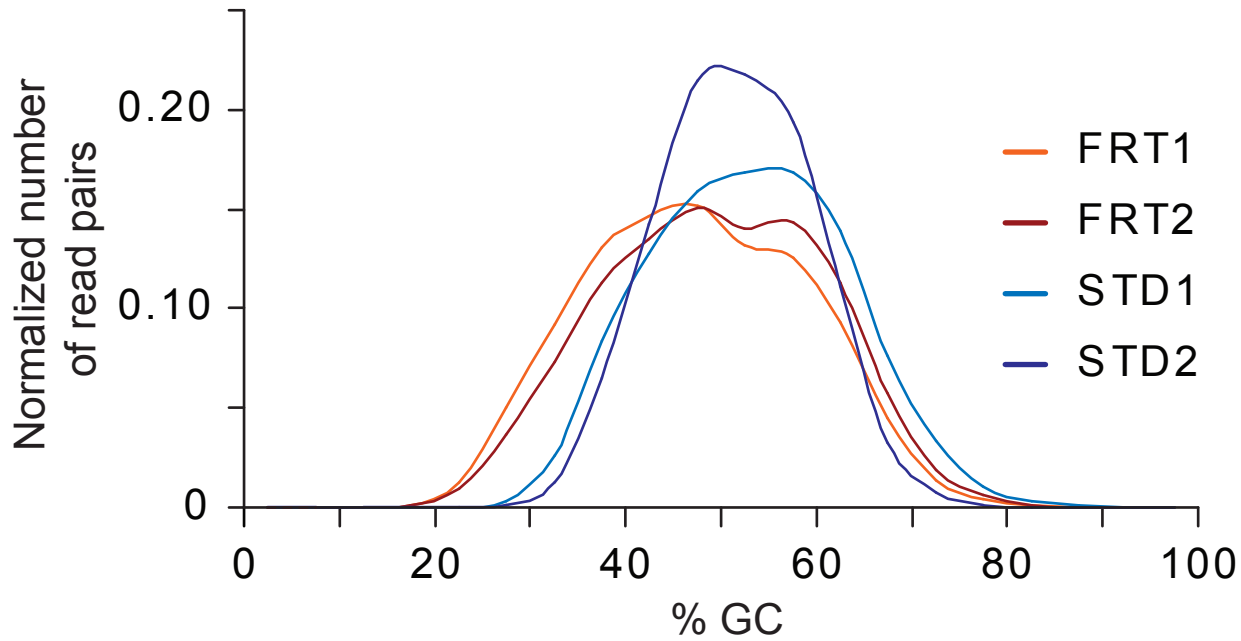

b)

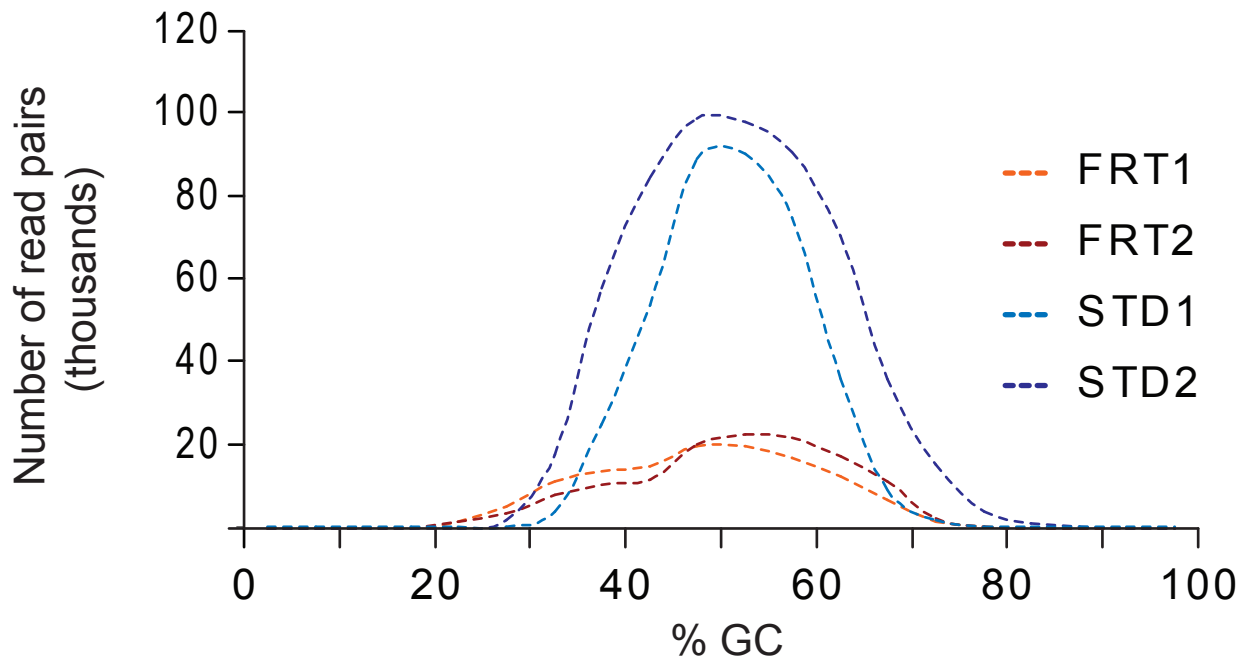

**Supplementary Figure 4. Effect of template GC on read depth.** Mapped sequences were divided into bins based upon the % GC of the entire fragment. This was plotted against **a)** normalized read count for all reads and **b)** read count for duplicate reads.

## Supplementary Figure 5

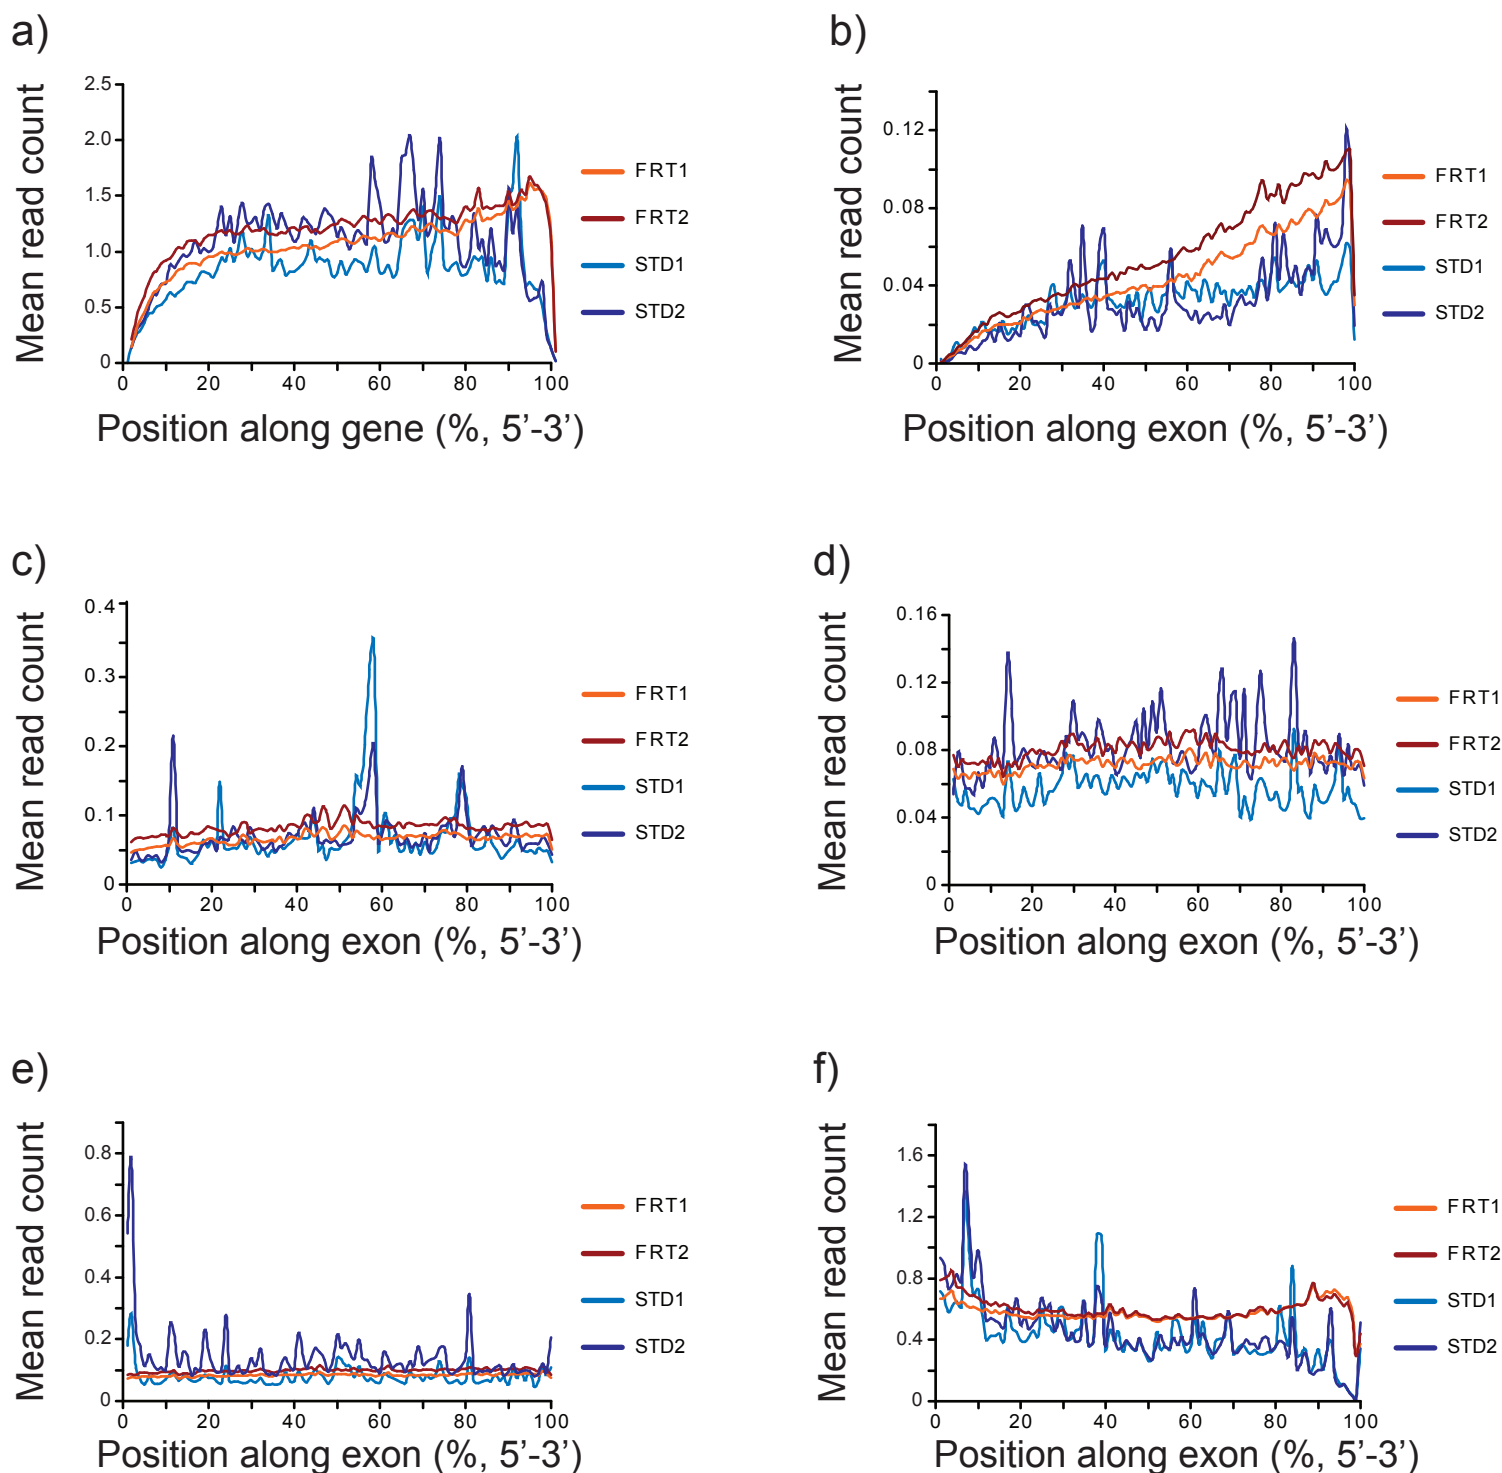

**Supplementary Figure 5. Distribution of reads plotted across transcripts.** Mean values of read count for all FRT lanes and all standard RNA-seq libraries in both orientations (Y-axis) are plotted against the position of mapped reads along the entire length of the exon / gene to which they map, expressed as a percentile. **a)** for entire genes. Panes **b)** - **f)** show data by exon for genes with 5 exons or more. Pane **b)** shows the first (5') exon, **c)** shows the second exon, **d)** shows the third exon, **e)** shows the penultimate exon and **f)** shows the 3' exon.

Supplementary Figure 6

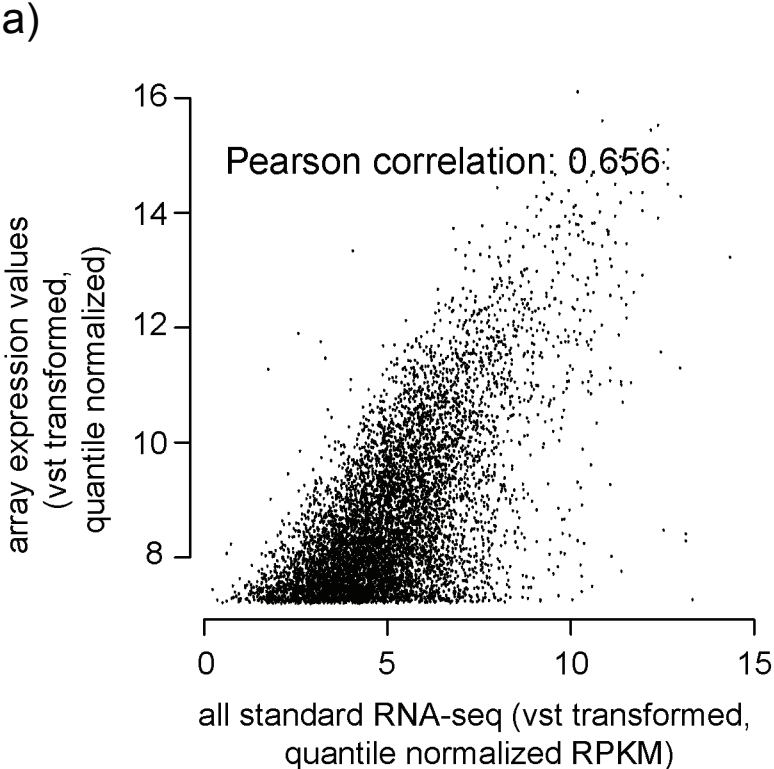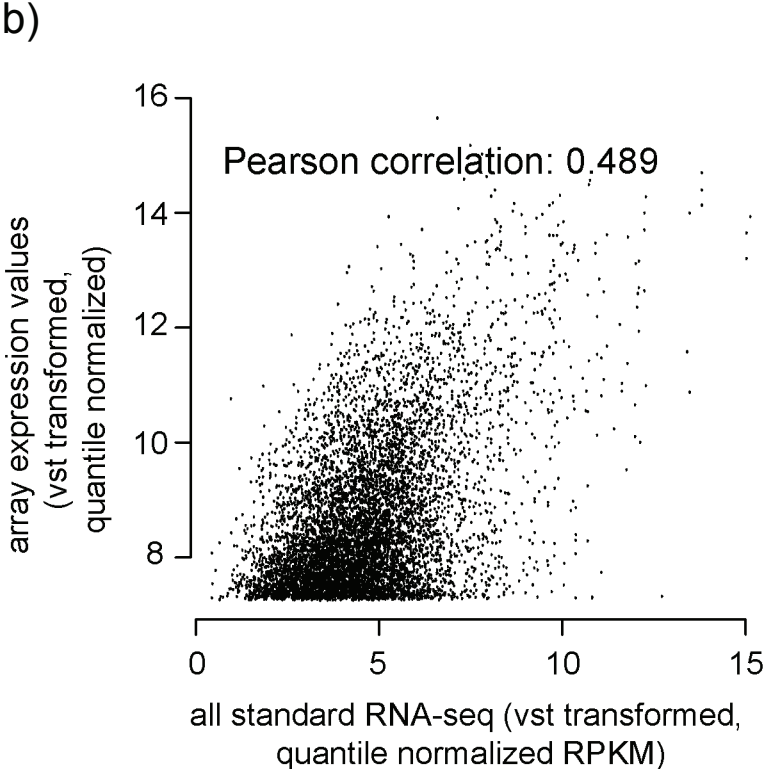

**Supplementary Figure 6. Microarray correlations for FRT-seq and Standard libraries.** To assess the quantitative nature of FRT-seq, and standard RNA-seq libraries, we plotted transcript counts derived from microarray data against a) both FRT-seq libraries combined, and b) both standard RNA-seq libraries combined.

## Supplementary Figure 7

a)

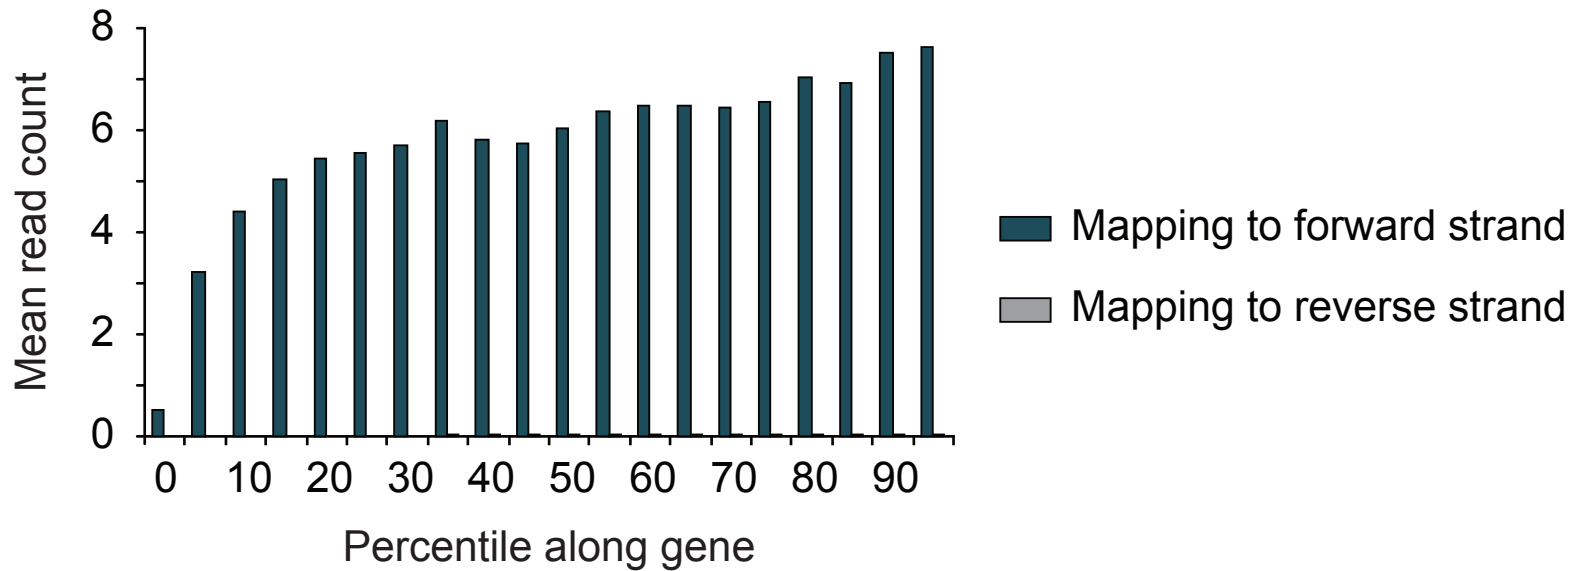

b)

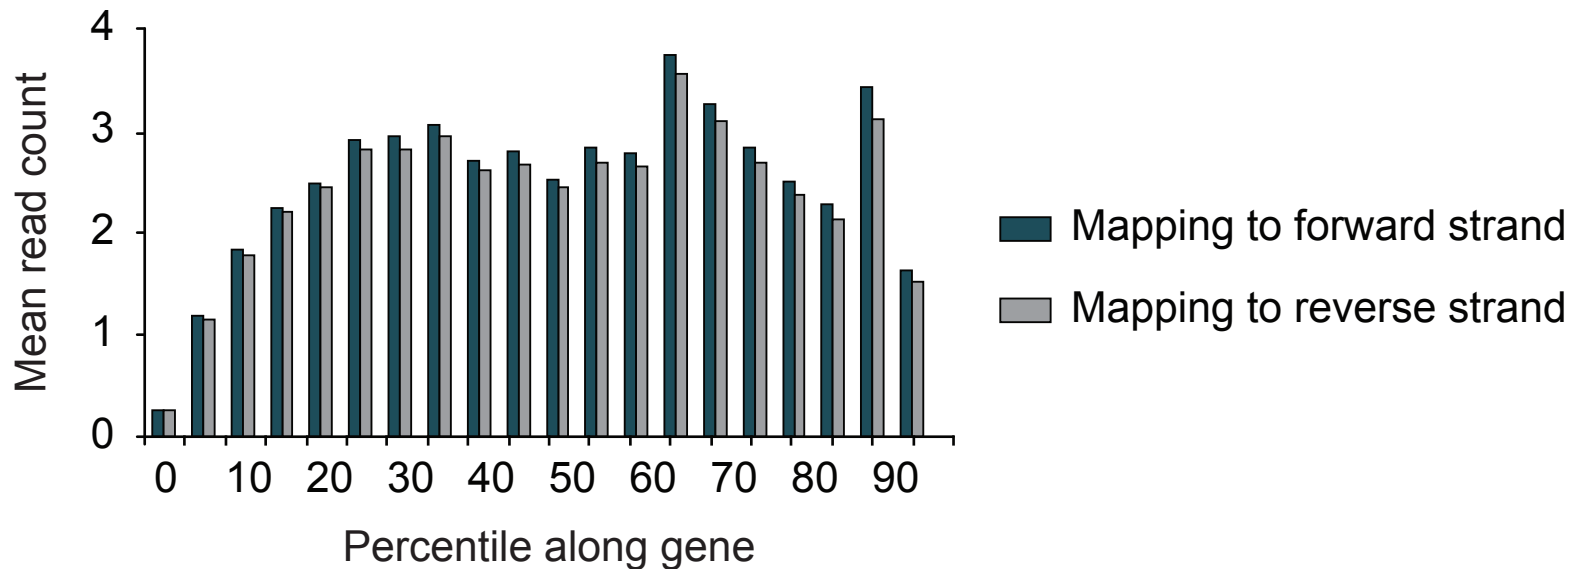

**Supplementary Figure 7. Distribution of reads plotted across transcripts for forward and reverse strands.** Mean values of read count in forward and reverse orientations for all FRT lanes and all standard RNA-seq libraries (Y-axis) are plotted against the position of mapped reads along the entire length of the gene to which they map, expressed as a percentile. **a)** mean values for both flowcell RT libraries and **b)** mean values for both standard RNA-seq libraries.

# Supplementary Figure 8

Mapping on forward strand,  
quality  $\geq 30$

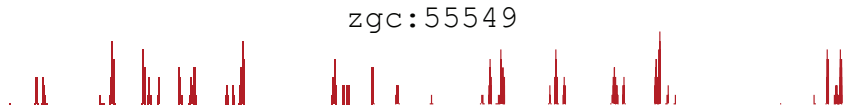

Ensembl(+)

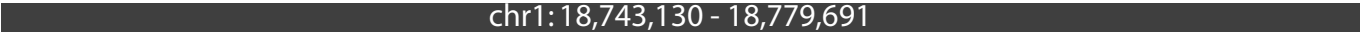

Coordinates (Mb)

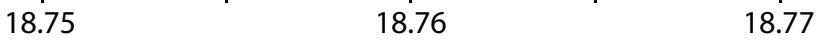

Mapping on reverse strand,  
quality  $\geq 30$

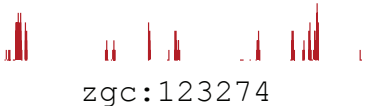

Ensembl(-)

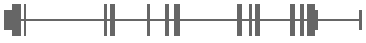

**Supplementary Figure 8. Strand specificity of Flowcell RT using zebrafish ovary poly A+ RNA.** Sequences generated by Flowcell RT were mapped against the zebrafish genome version Zv8, and .wig files were generated. These are shown displayed in IGB, though the colours were modified for clarity (dark red). Unlike the commercial human placental poly A+ RNA sample used for other experiments, very few sequences mapped to intronic regions.



**Supplementary Table 1. Oligonucleotide sequences.**

RNA bases are shown in blue, DNA bases in black.

RNA\_P7pr\_v7.2    pAGAUCCGAAGAGCGGUUCAG CAGGAATGCCGAGACCGATCTCGTATGCCGTCTTCTGCTTGddC 3'

RNA\_P5\_v7.1    [AmC6] AATGATACGGCGACCACCGAGATCTACACTCTTCCCT ACACGACGCUCUCCGAUCU 3'

**Supplementary Table 2. Spearman correlations between %GC and read coverage**

For reverse transcriptase, *Taq* polymerase and for the difference between the two sets of values (RT-Taq). % GC was calculated for padded 10bp sliding windows. Padding is added to both sides of the 10 bp window. For example, Pad = 45 corresponds to a fragment size of 100 bp. Correlations were calculated for the entire PhiX genome, for both reverse transcriptase, *Taq* polymerase, and the difference in read count for the two enzymes. The genome was then divided at either side of the mean % GC (44.7 %) into low and high % GC and the correlations were recalculated.

|     | Entire PhiX genome    |                |          | Low GC (<44.7%)       |                |          |                       | High GC (>44.7%)      |                |          |                       |
|-----|-----------------------|----------------|----------|-----------------------|----------------|----------|-----------------------|-----------------------|----------------|----------|-----------------------|
| Pad | Reverse transcriptase | Taq polymerase | RT - Taq | Reverse transcriptase | Taq polymerase | RT - Taq | % of sequences in bin | Reverse transcriptase | Taq polymerase | RT - Taq | % of sequences in bin |
| 5   | 0.2357                | 0.2758         | -0.3027  | 0.4000                | 0.4252         | -0.2584  | 34.69                 | 0.0199                | 0.0467         | -0.1524  | 65.31                 |
| 10  | 0.2499                | 0.3069         | -0.3811  | 0.3167                | 0.3480         | -0.2793  | 44.16                 | -0.0366               | -0.0043        | -0.1284  | 55.84                 |
| 15  | 0.2852                | 0.3447         | -0.4122  | 0.3080                | 0.3494         | -0.2967  | 37.48                 | -0.0074               | 0.0326         | -0.1902  | 62.52                 |
| 20  | 0.2926                | 0.3633         | -0.4632  | 0.2586                | 0.3102         | -0.3086  | 44.90                 | 0.0319                | 0.0695         | -0.1944  | 55.10                 |
| 25  | 0.3111                | 0.3814         | -0.4778  | 0.3172                | 0.3521         | -0.2885  | 39.89                 | 0.1273                | 0.1554         | -0.2427  | 60.11                 |
| 30  | 0.3265                | 0.3972         | -0.4954  | 0.3033                | 0.3661         | -0.3506  | 46.38                 | 0.0412                | 0.0730         | -0.1772  | 53.62                 |
| 35  | 0.3315                | 0.4023         | -0.5102  | 0.2916                | 0.3167         | -0.2037  | 39.70                 | 0.1029                | 0.1383         | -0.2472  | 60.30                 |
| 40  | 0.3198                | 0.3943         | -0.5263  | 0.3201                | 0.3527         | -0.2429  | 46.75                 | 0.0337                | 0.0632         | -0.1767  | 53.25                 |
| 45  | 0.3001                | 0.3794         | -0.5309  | 0.2897                | 0.3232         | -0.2605  | 42.86                 | 0.0462                | 0.0855         | -0.2758  | 57.14                 |
| 50  | 0.2975                | 0.3765         | -0.5244  | 0.3601                | 0.3982         | -0.2844  | 48.05                 | 0.0289                | 0.0566         | -0.2180  | 51.95                 |
| 55  | 0.2794                | 0.3607         | -0.5173  | 0.3815                | 0.4226         | -0.2122  | 44.34                 | -0.0160               | 0.0031         | -0.1407  | 55.66                 |
| 60  | 0.2742                | 0.3568         | -0.5163  | 0.3868                | 0.4430         | -0.3418  | 49.35                 | -0.0426               | -0.0210        | -0.1551  | 50.65                 |
| 65  | 0.2640                | 0.3491         | -0.5169  | 0.4140                | 0.4627         | -0.3208  | 44.53                 | -0.0437               | -0.0282        | -0.1061  | 55.47                 |
| 70  | 0.2725                | 0.3545         | -0.5123  | 0.3878                | 0.4371         | -0.3323  | 48.79                 | -0.0239               | -0.0376        | -0.0034  | 51.21                 |
| 75  | 0.2642                | 0.3474         | -0.5123  | 0.4564                | 0.4990         | -0.3222  | 45.08                 | 0.0035                | 0.0063         | -0.0600  | 54.92                 |
| 80  | 0.2785                | 0.3630         | -0.5217  | 0.3655                | 0.4181         | -0.3471  | 43.23                 | 0.0075                | 0.0103         | -0.0650  | 56.77                 |
| 85  | 0.2693                | 0.3573         | -0.5286  | 0.4071                | 0.4738         | -0.4207  | 45.83                 | 0.0329                | 0.0431         | -0.0830  | 54.17                 |
| 90  | 0.2883                | 0.3752         | -0.5352  | 0.4669                | 0.5347         | -0.4669  | 43.78                 | 0.1516                | 0.1695         | -0.1761  | 56.22                 |
| 95  | 0.2814                | 0.3717         | -0.5421  | 0.4440                | 0.5190         | -0.4695  | 46.75                 | 0.1724                | 0.1798         | -0.1312  | 53.25                 |
| 100 | 0.2944                | 0.3832         | -0.5427  | 0.4393                | 0.5033         | -0.4315  | 45.64                 | 0.1425                | 0.1409         | -0.1117  | 54.36                 |

**Supplementary Table 3. Pearson correlations between lanes and libraries.**

Pearson correlations between transcript counts for individual lanes, within libraries and between libraries, to test for library prep and sequencing reproducibility.

|                   |           | FRT-seq 1 |        |        |        |        |        |        | FRT-seq 2 |        |        |        |        |        |        |
|-------------------|-----------|-----------|--------|--------|--------|--------|--------|--------|-----------|--------|--------|--------|--------|--------|--------|
| library           | lane      | 2664_1    | 2664_2 | 2664_3 | 2664_5 | 2664_6 | 2664_7 | 2664_8 | 2665_1    | 2665_2 | 2665_3 | 2665_5 | 2665_6 | 2665_7 | 2665_8 |
| FRT-seq 1         | 2664_1    | 1.0000    | 0.9999 | 0.9997 | 0.9987 | 0.9997 | 0.9997 | 0.9998 | 0.9920    | 0.9927 | 0.9929 | 0.9925 | 0.9923 | 0.9928 | 0.9930 |
|                   | 2664_2    | 0.9999    | 1.0000 | 0.9999 | 0.9985 | 0.9996 | 0.9997 | 0.9997 | 0.9918    | 0.9927 | 0.9928 | 0.9923 | 0.9920 | 0.9925 | 0.9928 |
|                   | 2664_3    | 0.9997    | 0.9999 | 1.0000 | 0.9982 | 0.9997 | 0.9997 | 0.9997 | 0.9921    | 0.9930 | 0.9932 | 0.9927 | 0.9924 | 0.9928 | 0.9931 |
|                   | 2664_5    | 0.9987    | 0.9985 | 0.9982 | 1.0000 | 0.9978 | 0.9976 | 0.9981 | 0.9883    | 0.9892 | 0.9889 | 0.9883 | 0.9880 | 0.9888 | 0.9886 |
|                   | 2664_6    | 0.9997    | 0.9996 | 0.9997 | 0.9978 | 1.0000 | 0.9999 | 0.9999 | 0.9941    | 0.9946 | 0.9949 | 0.9946 | 0.9945 | 0.9949 | 0.9951 |
|                   | 2664_7    | 0.9997    | 0.9997 | 0.9997 | 0.9976 | 0.9999 | 1.0000 | 0.9999 | 0.9938    | 0.9943 | 0.9946 | 0.9944 | 0.9943 | 0.9946 | 0.9949 |
|                   | 2664_8    | 0.9998    | 0.9997 | 0.9997 | 0.9981 | 0.9999 | 0.9999 | 1.0000 | 0.9931    | 0.9935 | 0.9939 | 0.9937 | 0.9936 | 0.9941 | 0.9943 |
|                   | FRT-seq 2 | 2665_1    | 0.9920 | 0.9918 | 0.9921 | 0.9883 | 0.9941 | 0.9938 | 0.9931    | 1.0000 | 0.9997 | 0.9998 | 0.9997 | 0.9996 | 0.9993 |
| 2665_2            |           | 0.9927    | 0.9927 | 0.9930 | 0.9892 | 0.9946 | 0.9943 | 0.9935 | 0.9997    | 1.0000 | 0.9998 | 0.9995 | 0.9990 | 0.9988 | 0.9984 |
| 2665_3            |           | 0.9929    | 0.9928 | 0.9932 | 0.9889 | 0.9949 | 0.9946 | 0.9939 | 0.9998    | 0.9998 | 1.0000 | 0.9998 | 0.9995 | 0.9992 | 0.9989 |
| 2665_5            |           | 0.9925    | 0.9923 | 0.9927 | 0.9883 | 0.9946 | 0.9944 | 0.9937 | 0.9997    | 0.9995 | 0.9998 | 1.0000 | 0.9999 | 0.9998 | 0.9996 |
| 2665_6            |           | 0.9923    | 0.9920 | 0.9924 | 0.9880 | 0.9945 | 0.9943 | 0.9936 | 0.9996    | 0.9990 | 0.9995 | 0.9999 | 1.0000 | 0.9999 | 0.9997 |
| 2665_7            |           | 0.9928    | 0.9925 | 0.9928 | 0.9888 | 0.9949 | 0.9946 | 0.9941 | 0.9993    | 0.9988 | 0.9992 | 0.9998 | 0.9999 | 1.0000 | 0.9998 |
| 2665_8            |           | 0.9930    | 0.9928 | 0.9931 | 0.9886 | 0.9951 | 0.9949 | 0.9943 | 0.9989    | 0.9984 | 0.9989 | 0.9996 | 0.9997 | 0.9998 | 1.0000 |
| STD RNA-seq 1     |           | 3202_1    | 0.6636 | 0.6615 | 0.6616 | 0.6683 | 0.6664 | 0.6640 | 0.6643    | 0.6859 | 0.6839 | 0.6833 | 0.6833 | 0.6835 | 0.6846 |
|                   | 3202_2    | 0.6627    | 0.6605 | 0.6607 | 0.6674 | 0.6655 | 0.6631 | 0.6634 | 0.6851    | 0.6830 | 0.6825 | 0.6825 | 0.6828 | 0.6838 | 0.6800 |
|                   | 3202_3    | 0.6620    | 0.6598 | 0.6600 | 0.6667 | 0.6648 | 0.6624 | 0.6627 | 0.6845    | 0.6825 | 0.6819 | 0.6819 | 0.6821 | 0.6832 | 0.6794 |
|                   | 3202_5    | 0.6652    | 0.6631 | 0.6632 | 0.6698 | 0.6681 | 0.6657 | 0.6660 | 0.6878    | 0.6858 | 0.6853 | 0.6852 | 0.6855 | 0.6865 | 0.6829 |
| STD RNA-seq 2     | 3202_6    | 0.7518    | 0.7490 | 0.7508 | 0.7578 | 0.7575 | 0.7540 | 0.7539 | 0.7799    | 0.7755 | 0.7755 | 0.7763 | 0.7789 | 0.7790 | 0.7725 |
|                   | 3202_7    | 0.7521    | 0.7492 | 0.7511 | 0.7581 | 0.7578 | 0.7543 | 0.7542 | 0.7803    | 0.7760 | 0.7759 | 0.7767 | 0.7792 | 0.7793 | 0.7728 |
|                   | 3202_8    | 0.7516    | 0.7487 | 0.7506 | 0.7576 | 0.7573 | 0.7538 | 0.7537 | 0.7797    | 0.7753 | 0.7753 | 0.7761 | 0.7786 | 0.7788 | 0.7723 |
| All FRT-seq 1     |           | 1.0000    | 0.9998 | 0.9998 | 0.9984 | 0.9998 | 0.9998 | 1.0000 | 0.9926    | 0.9932 | 0.9934 | 0.9932 | 0.9930 | 0.9935 | 0.9937 |
| All FRT-seq 2     |           | 0.9928    | 0.9925 | 0.9929 | 0.9887 | 0.9949 | 0.9946 | 0.9940 | 0.9997    | 0.9993 | 0.9997 | 0.9999 | 0.9999 | 0.9999 | 0.9997 |
| All FRT-seq       |           | 0.9979    | 0.9977 | 0.9979 | 0.9949 | 0.9989 | 0.9988 | 0.9986 | 0.9975    | 0.9975 | 0.9979 | 0.9981 | 0.9981 | 0.9984 | 0.9985 |
| all STD RNA-seq 1 |           | 0.6645    | 0.6624 | 0.6625 | 0.6691 | 0.6674 | 0.6650 | 0.6653 | 0.6870    | 0.6850 | 0.6844 | 0.6844 | 0.6846 | 0.6857 | 0.6820 |
| all STD RNA-seq 2 |           | 0.7518    | 0.7489 | 0.7508 | 0.7577 | 0.7575 | 0.7540 | 0.7539 | 0.7799    | 0.7755 | 0.7755 | 0.7763 | 0.7788 | 0.7789 | 0.7724 |
| all STD RNA-seq   |           | 0.7359    | 0.7333 | 0.7344 | 0.7415 | 0.7404 | 0.7373 | 0.7374 | 0.7622    | 0.7588 | 0.7586 | 0.7590 | 0.7605 | 0.7611 | 0.7557 |

| STD RNA-seq 1 |        |        |        | STD RNA-seq 2 |        |        |           |           |             |               |               |                 |
|---------------|--------|--------|--------|---------------|--------|--------|-----------|-----------|-------------|---------------|---------------|-----------------|
| 3202_1        | 3202_2 | 3202_3 | 3202_5 | 3202_6        | 3202_7 | 3202_8 | FRT-seq 1 | FRT-seq 2 | all FRT-seq | STD RNA-seq 1 | STD RNA-seq 2 | all STD RNA-seq |
| 0.6636        | 0.6627 | 0.6620 | 0.6652 | 0.7518        | 0.7521 | 0.7516 | 1.0000    | 0.9928    | 0.9979      | 0.6645        | 0.7518        | 0.7359          |
| 0.6615        | 0.6605 | 0.6598 | 0.6631 | 0.7490        | 0.7492 | 0.7487 | 0.9998    | 0.9925    | 0.9977      | 0.6624        | 0.7489        | 0.7333          |
| 0.6616        | 0.6607 | 0.6600 | 0.6632 | 0.7508        | 0.7511 | 0.7506 | 0.9998    | 0.9929    | 0.9979      | 0.6625        | 0.7508        | 0.7344          |
| 0.6683        | 0.6674 | 0.6667 | 0.6698 | 0.7578        | 0.7581 | 0.7576 | 0.9984    | 0.9887    | 0.9949      | 0.6691        | 0.7577        | 0.7415          |
| 0.6664        | 0.6655 | 0.6648 | 0.6681 | 0.7575        | 0.7578 | 0.7573 | 0.9998    | 0.9949    | 0.9989      | 0.6674        | 0.7575        | 0.7404          |
| 0.6640        | 0.6631 | 0.6624 | 0.6657 | 0.7540        | 0.7543 | 0.7538 | 0.9998    | 0.9946    | 0.9988      | 0.6650        | 0.7540        | 0.7373          |
| 0.6643        | 0.6634 | 0.6627 | 0.6660 | 0.7539        | 0.7542 | 0.7537 | 1.0000    | 0.9940    | 0.9986      | 0.6653        | 0.7539        | 0.7374          |
| 0.6859        | 0.6851 | 0.6845 | 0.6878 | 0.7799        | 0.7803 | 0.7797 | 0.9926    | 0.9997    | 0.9975      | 0.6870        | 0.7799        | 0.7622          |
| 0.6839        | 0.6830 | 0.6825 | 0.6858 | 0.7755        | 0.7760 | 0.7753 | 0.9932    | 0.9993    | 0.9975      | 0.6850        | 0.7755        | 0.7588          |
| 0.6833        | 0.6825 | 0.6819 | 0.6853 | 0.7755        | 0.7759 | 0.7753 | 0.9934    | 0.9997    | 0.9979      | 0.6844        | 0.7755        | 0.7586          |
| 0.6833        | 0.6825 | 0.6819 | 0.6852 | 0.7763        | 0.7767 | 0.7761 | 0.9932    | 0.9999    | 0.9981      | 0.6844        | 0.7763        | 0.7590          |
| 0.6835        | 0.6828 | 0.6821 | 0.6855 | 0.7789        | 0.7792 | 0.7786 | 0.9930    | 0.9999    | 0.9981      | 0.6846        | 0.7788        | 0.7605          |
| 0.6846        | 0.6838 | 0.6832 | 0.6865 | 0.7790        | 0.7793 | 0.7788 | 0.9935    | 0.9999    | 0.9984      | 0.6857        | 0.7789        | 0.7611          |
| 0.6809        | 0.6800 | 0.6794 | 0.6829 | 0.7725        | 0.7728 | 0.7723 | 0.9937    | 0.9997    | 0.9985      | 0.6820        | 0.7724        | 0.7557          |
| 1.0000        | 0.9996 | 0.9996 | 0.9995 | 0.8645        | 0.8640 | 0.8648 | 0.6640    | 0.6836    | 0.6742      | 0.9999        | 0.8646        | 0.9604          |
| 0.9996        | 1.0000 | 0.9996 | 0.9996 | 0.8667        | 0.8662 | 0.8670 | 0.6631    | 0.6828    | 0.6733      | 0.9997        | 0.8668        | 0.9614          |
| 0.9996        | 0.9996 | 1.0000 | 0.9996 | 0.8667        | 0.8662 | 0.8670 | 0.6624    | 0.6821    | 0.6726      | 0.9997        | 0.8668        | 0.9614          |
| 0.9995        | 0.9996 | 0.9996 | 1.0000 | 0.8666        | 0.8661 | 0.8669 | 0.6656    | 0.6855    | 0.6760      | 0.9999        | 0.8667        | 0.9614          |
| 0.8645        | 0.8667 | 0.8667 | 0.8666 | 1.0000        | 0.9999 | 0.9999 | 0.7530    | 0.7764    | 0.7644      | 0.8657        | 1.0000        | 0.9702          |
| 0.8640        | 0.8662 | 0.8662 | 0.8661 | 0.9999        | 1.0000 | 0.9999 | 0.7532    | 0.7768    | 0.7647      | 0.8652        | 0.9999        | 0.9700          |
| 0.8648        | 0.8670 | 0.8670 | 0.8669 | 0.9999        | 0.9999 | 1.0000 | 0.7527    | 0.7762    | 0.7641      | 0.8660        | 1.0000        | 0.9704          |
| 0.6640        | 0.6631 | 0.6624 | 0.6656 | 0.7530        | 0.7532 | 0.7527 | 1.0000    | 0.9934    | 0.9983      | 0.6649        | 0.7529        | 0.7367          |
| 0.6836        | 0.6828 | 0.6821 | 0.6855 | 0.7764        | 0.7768 | 0.7762 | 0.9934    | 1.0000    | 0.9983      | 0.6847        | 0.7764        | 0.7592          |
| 0.6742        | 0.6733 | 0.6726 | 0.6760 | 0.7644        | 0.7647 | 0.7641 | 0.9983    | 0.9983    | 1.0000      | 0.6752        | 0.7643        | 0.7479          |
| 0.9999        | 0.9997 | 0.9997 | 0.9999 | 0.8657        | 0.8652 | 0.8660 | 0.6649    | 0.6847    | 0.6752      | 1.0000        | 0.8658        | 0.9610          |
| 0.8646        | 0.8668 | 0.8668 | 0.8667 | 1.0000        | 0.9999 | 1.0000 | 0.7529    | 0.7764    | 0.7643      | 0.8658        | 1.0000        | 0.9703          |
| 0.9604        | 0.9614 | 0.9614 | 0.9614 | 0.9702        | 0.9700 | 0.9704 | 0.7367    | 0.7592    | 0.7479      | 0.9610        | 0.9703        | 1.0000          |

**Supplementary Table 4. Duplicate reads for each library.**

Reverse complementary duplicates are chiefly an artefact of the PCR step in a library prep that is not strand-specific. ‘% read pairs with  $\geq 1$  duplicate’ indicates the absolute percentage of duplicate sequences in the different libraries, whereas ‘% transcriptomic positions with  $\geq 1$  mapped duplicate’ indicates the % of sites to which duplicate sequences map.

|                       | Lane ID           | Total mapped read pairs | Total transcriptomic positions with mapped read pairs | Read pairs with $\geq 1$ duplicate | Transcriptomic positions with $\geq 1$ mapped duplicate | Read pairs with $\geq 1$ reverse complementary duplicate | % read pairs with $\geq 1$ duplicate | % transcriptomic positions with $\geq 1$ mapped duplicate | % read pairs with $\geq 1$ reverse complementary duplicate |
|-----------------------|-------------------|-------------------------|-------------------------------------------------------|------------------------------------|---------------------------------------------------------|----------------------------------------------------------|--------------------------------------|-----------------------------------------------------------|------------------------------------------------------------|
| FRT-seq library 1     | 2664_1            | 1324788                 | 1271481                                               | 80333                              | 27026                                                   | 0                                                        | 6.06                                 | 2.13                                                      | 0.00                                                       |
|                       | 2664_2            | 1262486                 | 1212363                                               | 76650                              | 26527                                                   | 0                                                        | 6.07                                 | 2.19                                                      | 0.00                                                       |
|                       | 2664_3            | 1263575                 | 1216929                                               | 70973                              | 24327                                                   | 2                                                        | 5.62                                 | 2.00                                                      | 0.00                                                       |
|                       | 2664_5            | 1140866                 | 1103475                                               | 57195                              | 19804                                                   | 0                                                        | 5.01                                 | 1.79                                                      | 0.00                                                       |
|                       | 2664_6            | 1377672                 | 1320307                                               | 88164                              | 30799                                                   | 4                                                        | 6.40                                 | 2.33                                                      | 0.00                                                       |
|                       | 2664_7            | 1539237                 | 1471781                                               | 101659                             | 34203                                                   | 0                                                        | 6.60                                 | 2.32                                                      | 0.00                                                       |
|                       | 2664_8            | 1404722                 | 1343867                                               | 93517                              | 32662                                                   | 2                                                        | 6.66                                 | 2.43                                                      | 0.00                                                       |
|                       | FRT-seq library 2 | 2665_1                  | 1398046                                               | 1327633                            | 99010                                                   | 28597                                                    | 0                                    | 7.08                                                      | 2.15                                                       |
| 2665_2                |                   | 1169470                 | 1115347                                               | 76348                              | 22225                                                   | 0                                                        | 6.53                                 | 1.99                                                      | 0.00                                                       |
| 2665_3                |                   | 1438074                 | 1365830                                               | 101321                             | 29077                                                   | 0                                                        | 7.05                                 | 2.13                                                      | 0.00                                                       |
| 2665_5                |                   | 1627890                 | 1540787                                               | 121056                             | 33953                                                   | 0                                                        | 7.44                                 | 2.20                                                      | 0.00                                                       |
| 2665_6                |                   | 1667040                 | 1577096                                               | 125146                             | 35202                                                   | 7                                                        | 7.51                                 | 2.23                                                      | 0.00                                                       |
| 2665_7                |                   | 1589797                 | 1505822                                               | 117302                             | 33327                                                   | 2                                                        | 7.38                                 | 2.21                                                      | 0.00                                                       |
| 2665_8                |                   | 1384241                 | 1314180                                               | 98375                              | 28314                                                   | 0                                                        | 7.11                                 | 2.15                                                      | 0.00                                                       |
| STD RNA-seq library 1 |                   | 3202_1                  | 1885143                                               | 446241                             | 1766768                                                 | 327866                                                   | 572                                  | 93.72                                                     | 73.47                                                      |
|                       | 3202_2            | 2015908                 | 453679                                                | 1900588                            | 338359                                                  | 602                                                      | 94.28                                | 74.58                                                     | 0.03                                                       |
|                       | 3202_3            | 2014349                 | 452612                                                | 1899698                            | 337961                                                  | 562                                                      | 94.31                                | 74.67                                                     | 0.03                                                       |
|                       | 3202_5            | 1968366                 | 450628                                                | 1852300                            | 334562                                                  | 592                                                      | 94.10                                | 74.24                                                     | 0.03                                                       |
| STD RNA-seq library 2 | 3202_6            | 1414876                 | 985120                                                | 569216                             | 139460                                                  | 187                                                      | 40.23                                | 14.16                                                     | 0.01                                                       |
|                       | 3202_7            | 1371305                 | 960292                                                | 544014                             | 133001                                                  | 190                                                      | 39.67                                | 13.85                                                     | 0.01                                                       |
|                       | 3202_8            | 1309552                 | 923075                                                | 511800                             | 125323                                                  | 179                                                      | 39.08                                | 13.58                                                     | 0.01                                                       |

**Supplementary Table 5. Sequence count in all orientations for sequences obtained from all libraries.**

0 = not mapped, dg = other read maps to a different gene. Poly T is the reverse complement of the 3' poly A tail that is present on the 3' end of mature mRNA strands, and would prevent read 2 from mapping. A fragment consisting mainly of poly A would generate poly T in read 2 and some poly A in read 1, so would fail to map. We used only those reads for which a mapping score  $\geq 30$  was obtained.

+ - Read 1 maps to sense strand and read 2 maps to antisense strand;

- + Read 2 maps to sense strand and read 1 maps to antisense strand;

++ Both reads map to the sense strand;

-- Both reads map to the antisense strand.

A mapping score threshold of 30 was used. For + and - orientations, data was required to be paired, whereas for dg and null read pairs it was not.

**FRT-seq**

| library    | Lane   | +/+  | +/-     | -/+   | -/-  | +/0   | -/0   | 0/+   | 0/-    | + / poly T | - / poly | poly T / + | poly T / - | + / dg | - / dg | dg / + | dg / - |
|------------|--------|------|---------|-------|------|-------|-------|-------|--------|------------|----------|------------|------------|--------|--------|--------|--------|
| FRT-seq 1  | 2664_1 | 0    | 965003  | 3127  | 0    | 68887 | 818   | 843   | 36260  | 1798       | 59       | 6          | 291        | 474    | 4      | 7      | 159    |
| FRT-seq 1  | 2664_2 | 0    | 920633  | 3122  | 0    | 75381 | 761   | 790   | 34832  | 1684       | 67       | 4          | 266        | 432    | 4      | 4      | 187    |
| FRT-seq 1  | 2664_3 | 0    | 922121  | 3183  | 0    | 87912 | 870   | 746   | 32498  | 1736       | 52       | 7          | 254        | 461    | 1      | 16     | 217    |
| FRT-seq 1  | 2664_5 | 0    | 814800  | 2835  | 0    | 61704 | 683   | 686   | 30210  | 1620       | 74       | 2          | 264        | 427    | 2      | 9      | 163    |
| FRT-seq 1  | 2664_6 | 0    | 1006475 | 3324  | 0    | 81225 | 889   | 851   | 36916  | 1823       | 37       | 5          | 276        | 496    | 2      | 7      | 193    |
| FRT-seq 1  | 2664_7 | 0    | 1120329 | 3725  | 0    | 78684 | 948   | 956   | 41478  | 1992       | 52       | 9          | 302        | 578    | 4      | 9      | 218    |
| FRT-seq 1  | 2664_8 | 0    | 1017022 | 3463  | 0    | 75698 | 807   | 895   | 38408  | 1788       | 52       | 3          | 260        | 500    | 1      | 7      | 194    |
| FRT-seq 2  | 2665_1 | 0    | 1052227 | 3427  | 0    | 66819 | 839   | 808   | 39279  | 1360       | 30       | 7          | 211        | 509    | 3      | 8      | 191    |
| FRT-seq 2  | 2665_2 | 0    | 876144  | 2887  | 0    | 70695 | 708   | 650   | 31523  | 1126       | 33       | 6          | 202        | 400    | 2      | 12     | 223    |
| FRT-seq 2  | 2665_3 | 0    | 1081283 | 3539  | 0    | 72861 | 827   | 817   | 37636  | 1459       | 39       | 4          | 250        | 528    | 2      | 11     | 240    |
| FRT-seq 2  | 2665_5 | 0    | 1224159 | 4014  | 0    | 76586 | 965   | 909   | 45285  | 1497       | 52       | 6          | 231        | 580    | 2      | 6      | 284    |
| FRT-seq 2  | 2665_6 | 0    | 1254076 | 4039  | 0    | 77664 | 1002  | 976   | 45518  | 1494       | 48       | 8          | 262        | 620    | 5      | 9      | 248    |
| FRT-seq 2  | 2665_7 | 0    | 1196943 | 3890  | 0    | 74618 | 919   | 902   | 43807  | 1392       | 35       | 6          | 270        | 568    | 4      | 5      | 229    |
| FRT-seq 2  | 2665_8 | 0    | 1045435 | 3296  | 0    | 65035 | 846   | 801   | 38259  | 1237       | 38       | 3          | 219        | 518    | 3      | 11     | 174    |
| Total      |        | 0    | 1.4E+07 | 47871 | 0    | 1E+06 | 11882 | 11630 | 531909 | 22006      | 668      | 76         | 3558       | 7091   | 39     | 121    | 2920   |
| % of total |        | 0.00 | 89.65   | 0.30  | 0.00 | 6.39  | 0.07  | 0.07  | 3.29   | 0.14       | 0.00     | 0.00       | 0.02       | 0.04   | 0.00   | 0.00   | 0.02   |

**STD RNA-seq**

| library       | Lane   | +/+  | +/-     | -/+   | -/-  | + / 0  | - / 0 | 0 / + | 0 / - | + / poly<br>T | - /<br>poly | poly<br>T / + | poly<br>T / - | + /<br>dg | - / dg | dg /<br>+ | dg / - |
|---------------|--------|------|---------|-------|------|--------|-------|-------|-------|---------------|-------------|---------------|---------------|-----------|--------|-----------|--------|
| STD RNA-seq 1 | 3202_8 | 0    | 383622  | 4E+05 | 0    | 13802  | 9076  | 11883 | 8526  | 109           | 81          | 53            | 128           | 202       | 66     | 171       | 34     |
| STD RNA-seq 1 | 3202_7 | 0    | 414900  | 4E+05 | 0    | 14579  | 9865  | 12464 | 9068  | 95            | 57          | 72            | 112           | 207       | 54     | 202       | 37     |
| STD RNA-seq 1 | 3202_6 | 0    | 415561  | 4E+05 | 0    | 14769  | 9748  | 12355 | 9170  | 101           | 64          | 75            | 106           | 222       | 46     | 192       | 47     |
| STD RNA-seq 1 | 3202_5 | 0    | 410308  | 4E+05 | 0    | 14500  | 9546  | 12042 | 9071  | 95            | 58          | 60            | 110           | 212       | 61     | 213       | 40     |
| STD RNA-seq 2 | 3202_3 | 0    | 550861  | 5E+05 | 0    | 18121  | 7576  | 16628 | 7368  | 80            | 53          | 25            | 51            | 88        | 72     | 89        | 54     |
| STD RNA-seq 2 | 3202_2 | 0    | 534373  | 5E+05 | 0    | 17441  | 7358  | 16040 | 7013  | 68            | 48          | 38            | 46            | 86        | 61     | 77        | 74     |
| STD RNA-seq 2 | 3202_1 | 0    | 511475  | 5E+05 | 0    | 16533  | 6986  | 14996 | 6827  | 69            | 50          | 32            | 50            | 98        | 62     | 76        | 52     |
| Total         |        | 0    | 3221100 | 3E+06 | 0    | 109745 | 60155 | 96408 | 57043 | 617           | 411         | 355           | 603           | 1115      | 422    | 1020      | 338    |
| % of total    |        | 0.00 | 48.58   | 46.47 | 0.00 | 1.66   | 0.91  | 1.45  | 0.86  | 0.01          | 0.01        | 0.01          | 0.01          | 0.02      | 0.01   | 0.02      | 0.01   |





**Supplementary Table 6. Hits in exons, introns and intergenic regions.** Only paired reads were considered, but each read was assigned to the categories separately.

+ - Read 1 maps to sense strand and read 2 maps to antisense strand;

- + Read 2 maps to sense strand and read 1 maps to antisense strand;

Within Exon = read pair maps to transcriptome within 250bp and the read being considered falls entirely within an exon

Within Intron = read pair maps to transcriptome within 250bp and the read being considered falls entirely within an intron

Exon-Exon = read pair maps to transcriptome within 250bp and the read being considered overlaps boundary between exons

Exon-Intron = read pair maps to genome and the read being considered overlaps an internal exon-intron boundary

Exon-Intergenic = read pair maps to genome and the read being considered overlaps first or last exon – intergenic boundary

Promoter = read pair maps to genome 1kb upstream from 1<sup>st</sup> exon

Intergenic = read pair maps to genome and falls outside of genes

|                         |        |                   | Within Exon<br>+ - | Within Exon<br>- + | Within Intron<br>+ - | Within Intron<br>- + | Exon Exon<br>+ - | Exon Exon<br>- + | Exon Intron<br>+ - | Exon Intron<br>- + | Exon Intergenic<br>+ - | Exon Intergenic<br>- + | Promoter<br>+ - | Promoter<br>- + | Intergenic |
|-------------------------|--------|-------------------|--------------------|--------------------|----------------------|----------------------|------------------|------------------|--------------------|--------------------|------------------------|------------------------|-----------------|-----------------|------------|
| FRT-seq<br>library<br>1 | 2664_1 | sequence count    | 1741845            | 7594               | 235593               | 22222                | 263658           | 130              | 0                  | 0                  | 9687                   | 285                    | 7520            | 5374            | 274478     |
|                         |        | % of total        | 67.82%             | 0.30%              | 9.17%                | 0.87%                | 10.27%           | 0.01%            | 0.00%              | 0.00%              | 0.38%                  | 0.01%                  | 0.29%           | 0.21%           | 10.69%     |
|                         |        | % by orientation  | 77.13%             | 21.33%             | 10.43%               | 62.41%               | 11.68%           | 0.37%            | 0.00%              | 0.00%              | 0.43%                  | 0.80%                  | 0.33%           | 15.09%          | N/A        |
|                         |        | % within location | 99.57%             | 0.43%              | 91.38%               | 8.62%                | 99.95%           | 0.05%            | -                  | -                  | 97.14%                 | 2.86%                  | 58.32%          | 41.68%          | 100%       |
|                         | 2664_2 | sequence count    | 1669821            | 7497               | 227442               | 21696                | 251878           | 124              | 0                  | 0                  | 9172                   | 324                    | 7370            | 4823            | 261565     |
|                         |        | % of total        | 67.83%             | 0.29%              | 8.86%                | 0.84%                | 9.81%            | 0.00%            | 0.00%              | 0.00%              | 0.36%                  | 0.01%                  | 0.29%           | 0.19%           | 10.18%     |
|                         |        | % by orientation  | 77.10%             | 21.75%             | 10.50%               | 62.95%               | 11.63%           | 0.36%            | 0.00%              | 0.00%              | 0.42%                  | 0.94%                  | 0.34%           | 13.99%          | N/A        |
|                         |        | % within location | 99.55%             | 0.45%              | 91.29%               | 8.71%                | 99.95%           | 0.05%            | -                  | -                  | 96.59%                 | 3.41%                  | 60.44%          | 39.56%          | 100%       |
|                         | 2664_3 | sequence count    | 1685578            | 7722               | 229210               | 21990                | 253153           | 109              | 0                  | 0                  | 9417                   | 306                    | 7132            | 4414            | 261085     |
|                         |        | % of total        | 67.96%             | 0.30%              | 8.92%                | 0.86%                | 9.86%            | 0.00%            | 0.00%              | 0.00%              | 0.37%                  | 0.01%                  | 0.28%           | 0.17%           | 10.17%     |
|                         |        | % by orientation  | 77.16%             | 22.36%             | 10.49%               | 63.66%               | 11.59%           | 0.32%            | 0.00%              | 0.00%              | 0.43%                  | 0.89%                  | 0.33%           | 12.78%          | N/A        |
|                         |        | % within location | 99.54%             | 0.46%              | 91.25%               | 8.75%                | 99.96%           | 0.04%            | -                  | -                  | 96.85%                 | 3.15%                  | 61.77%          | 38.23%          | 100%       |
|                         | 2664_5 | sequence count    | 1484038            | 6780               | 211368               | 20680                | 217414           | 109              | 0                  | 0                  | 8622                   | 247                    | 5932            | 3707            | 239478     |
|                         |        | % of total        | 67.51%             | 0.26%              | 8.23%                | 0.81%                | 8.47%            | 0.00%            | 0.00%              | 0.00%              | 0.34%                  | 0.01%                  | 0.23%           | 0.14%           | 9.32%      |
|                         |        | % by orientation  | 77.00%             | 21.51%             | 10.97%               | 65.60%               | 11.28%           | 0.35%            | 0.00%              | 0.00%              | 0.45%                  | 0.78%                  | 0.31%           | 11.76%          | N/A        |
|                         |        | % within location | 99.55%             | 0.45%              | 91.09%               | 8.91%                | 99.95%           | 0.05%            | -                  | -                  | 97.22%                 | 2.78%                  | 61.54%          | 38.46%          | 100%       |

|                         |        |                   |         |        |        |        |        |       |       |        |        |        |        |        |        |
|-------------------------|--------|-------------------|---------|--------|--------|--------|--------|-------|-------|--------|--------|--------|--------|--------|--------|
| FRT-seq<br>library<br>1 | 2664_6 | sequence count    | 1822759 | 8043   | 243879 | 23474  | 277061 | 127   | 0     | 0      | 10016  | 298    | 8320   | 5234   | 280559 |
|                         |        | % of total        | 68.02%  | 0.31%  | 9.50%  | 0.91%  | 10.79% | 0.00% | 0.00% | 0.00%  | 0.39%  | 0.01%  | 0.32%  | 0.20%  | 10.92% |
|                         |        | % by orientation  | 77.17%  | 21.63% | 10.32% | 63.14% | 11.73% | 0.34% | 0.00% | 0.00%  | 0.42%  | 0.80%  | 0.35%  | 14.08% | N/A    |
|                         |        | % within location | 99.56%  | 0.44%  | 91.22% | 8.78%  | 99.95% | 0.05% | -     | -      | 97.11% | 2.89%  | 61.38% | 38.62% | 100%   |
|                         | 2664_7 | sequence count    | 2018819 | 9010   | 270090 | 25995  | 306646 | 141   | 0     | 0      | 11126  | 339    | 8861   | 6074   | 316668 |
|                         |        | % of total        | 67.89%  | 0.35%  | 10.52% | 1.01%  | 11.94% | 0.01% | 0.00% | 0.00%  | 0.43%  | 0.01%  | 0.35%  | 0.24%  | 12.33% |
|                         |        | % by orientation  | 77.19%  | 21.68% | 10.33% | 62.55% | 11.72% | 0.34% | 0.00% | 0.00%  | 0.43%  | 0.82%  | 0.34%  | 14.62% | N/A    |
|                         |        | % within location | 99.56%  | 0.44%  | 91.22% | 8.78%  | 99.95% | 0.05% | -     | -      | 97.04% | 2.96%  | 59.33% | 40.67% | 100%   |
|                         | 2664_8 | sequence count    | 1838485 | 8266   | 248659 | 23778  | 278350 | 147   | 0     | 0      | 10142  | 318    | 7840   | 5293   | 290639 |
| % of total              |        | 67.79%            | 0.32%   | 9.68%  | 0.93%  | 10.84% | 0.01%  | 0.00% | 0.00% | 0.39%  | 0.01%  | 0.31%  | 0.21%  | 11.32% |        |
| % by orientation        |        | 77.13%            | 21.87%  | 10.43% | 62.90% | 11.68% | 0.39%  | 0.00% | 0.00% | 0.43%  | 0.84%  | 0.33%  | 14.00% | N/A    |        |
| % within location       |        | 99.55%            | 0.45%   | 91.27% | 8.73%  | 99.95% | 0.05%  | -     | -     | 96.96% | 3.04%  | 59.70% | 40.30% | 100%   |        |

|                         |                   |                   | Within Exon<br>+ - | Within Exon<br>- + | Within Intron<br>+ - | Within Intron<br>- + | Exon Exon<br>+ - | Exon Exon<br>- + | Exon Intron<br>+ - | Exon Intron<br>- + | Exon Intergenic<br>+ - | Exon Intergenic<br>- + | Promoter<br>+ - | Promoter<br>- + | Intergenic |
|-------------------------|-------------------|-------------------|--------------------|--------------------|----------------------|----------------------|------------------|------------------|--------------------|--------------------|------------------------|------------------------|-----------------|-----------------|------------|
| FRT-seq<br>library<br>2 | 2665_1            | sequence count    | 1872024            | 8145               | 230363               | 21418                | 298644           | 167              | 0                  | 0                  | 9335                   | 311                    | 8541            | 5737            | 280811     |
|                         |                   | % of total        | 68.43%             | 0.32%              | 8.97%                | 0.83%                | 11.63%           | 0.01%            | 0.00%              | 0.00%              | 0.36%                  | 0.01%                  | 0.33%           | 0.22%           | 10.93%     |
|                         |                   | % by orientation  | 77.39%             | 22.77%             | 9.52%                | 59.86%               | 12.35%           | 0.47%            | 0.00%              | 0.00%              | 0.39%                  | 0.87%                  | 0.35%           | 16.03%          | N/A        |
|                         |                   | % within location | 99.57%             | 0.43%              | 91.49%               | 8.51%                | 99.94%           | 0.06%            | -                  | -                  | 96.78%                 | 3.22%                  | 59.82%          | 40.18%          | 100%       |
|                         | 2665_2            | sequence count    | 1575623            | 6854               | 200153               | 18911                | 249473           | 106              | 0                  | 0                  | 7859                   | 259                    | 6789            | 4539            | 236432     |
|                         |                   | % of total        | 68.30%             | 0.27%              | 7.79%                | 0.74%                | 9.71%            | 0.00%            | 0.00%              | 0.00%              | 0.31%                  | 0.01%                  | 0.26%           | 0.18%           | 9.21%      |
|                         |                   | % by orientation  | 77.24%             | 22.35%             | 9.81%                | 61.66%               | 12.23%           | 0.35%            | 0.00%              | 0.00%              | 0.39%                  | 0.84%                  | 0.33%           | 14.80%          | N/A        |
|                         |                   | % within location | 99.57%             | 0.43%              | 91.37%               | 8.63%                | 99.96%           | 0.04%            | -                  | -                  | 96.81%                 | 3.19%                  | 59.93%          | 40.07%          | 100%       |
| 2665_3                  | sequence count    | 1926512           | 8289               | 240042             | 22337                | 308731               | 167              | 0                | 0                  | 9534               | 336                    | 8615                   | 5658            | 288761          |            |
|                         | % of total        | 68.34%            | 0.32%              | 9.35%              | 0.87%                | 12.02%               | 0.01%            | 0.00%            | 0.00%              | 0.37%              | 0.01%                  | 0.34%                  | 0.22%           | 11.24%          |            |
|                         | % by orientation  | 77.26%            | 22.53%             | 9.63%              | 60.72%               | 12.38%               | 0.45%            | 0.00%            | 0.00%              | 0.38%              | 0.91%                  | 0.35%                  | 15.38%          | N/A             |            |
|                         | % within location | 99.57%            | 0.43%              | 91.49%             | 8.51%                | 99.95%               | 0.05%            | -                | -                  | 96.60%             | 3.40%                  | 60.36%                 | 39.64%          | 100%            |            |
| 2665_5                  | sequence count    | 2176465           | 9505               | 268101             | 24845                | 347591               | 144              | 0                | 0                  | 10653              | 421                    | 9793                   | 6752            | 325557          |            |
|                         | % of total        | 68.45%            | 0.37%              | 10.44%             | 0.97%                | 13.53%               | 0.01%            | 0.00%            | 0.00%              | 0.41%              | 0.02%                  | 0.38%                  | 0.26%           | 12.68%          |            |
|                         | % by orientation  | 77.38%            | 22.81%             | 9.53%              | 59.63%               | 12.36%               | 0.35%            | 0.00%            | 0.00%              | 0.38%              | 1.01%                  | 0.35%                  | 16.20%          | N/A             |            |
|                         | % within location | 99.57%            | 0.43%              | 91.52%             | 8.48%                | 99.96%               | 0.04%            | -                | -                  | 96.20%             | 3.80%                  | 59.19%                 | 40.81%          | 100%            |            |
| 2665_6                  | sequence count    | 2226092           | 9659               | 272290             | 25206                | 357368               | 182              | 0                | 0                  | 10875              | 378                    | 9963                   | 6819            | 331166          |            |
|                         | % of total        | 68.50%            | 0.38%              | 10.60%             | 0.98%                | 13.91%               | 0.01%            | 0.00%            | 0.00%              | 0.42%              | 0.01%                  | 0.39%                  | 0.27%           | 12.89%          |            |
|                         | % by orientation  | 77.39%            | 22.86%             | 9.47%              | 59.67%               | 12.42%               | 0.43%            | 0.00%            | 0.00%              | 0.38%              | 0.89%                  | 0.35%                  | 16.14%          | N/A             |            |
|                         | % within location | 99.57%            | 0.43%              | 91.53%             | 8.47%                | 99.95%               | 0.05%            | -                | -                  | 96.64%             | 3.36%                  | 59.37%                 | 40.63%          | 100%            |            |
| 2665_7                  | sequence count    | 2128194           | 9184               | 260537             | 24087                | 339603               | 182              | 0                | 0                  | 10423              | 346                    | 9314                   | 6527            | 314858          |            |
|                         | % of total        | 68.58%            | 0.36%              | 10.14%             | 0.94%                | 13.22%               | 0.01%            | 0.00%            | 0.00%              | 0.41%              | 0.01%                  | 0.36%                  | 0.25%           | 12.26%          |            |
|                         | % by orientation  | 77.44%            | 22.77%             | 9.48%              | 59.73%               | 12.36%               | 0.45%            | 0.00%            | 0.00%              | 0.38%              | 0.86%                  | 0.34%                  | 16.19%          | N/A             |            |
|                         | % within location | 99.57%            | 0.43%              | 91.54%             | 8.46%                | 99.95%               | 0.05%            | -                | -                  | 96.79%             | 3.21%                  | 58.80%                 | 41.20%          | 100%            |            |
| 2665_8                  | sequence count    | 1855899           | 7851               | 223763             | 20696                | 298774               | 141              | 0                | 0                  | 8994               | 286                    | 8651                   | 5726            | 271218          |            |
|                         | % of total        | 68.69%            | 0.31%              | 8.71%              | 0.81%                | 11.63%               | 0.01%            | 0.00%            | 0.00%              | 0.35%              | 0.01%                  | 0.34%                  | 0.22%           | 10.56%          |            |
|                         | % by orientation  | 77.46%            | 22.63%             | 9.34%              | 59.64%               | 12.47%               | 0.41%            | 0.00%            | 0.00%              | 0.38%              | 0.82%                  | 0.36%                  | 16.50%          | N/A             |            |
|                         | % within location | 99.58%            | 0.42%              | 91.53%             | 8.47%                | 99.95%               | 0.05%            | -                | -                  | 96.92%             | 3.08%                  | 60.17%                 | 39.83%          | 100%            |            |

|                             |                   |                   | Within Exon<br>+ - | Within Exon<br>- + | Within Intron<br>+ - | Within Intron<br>- + | Exon Exon<br>+ - | Exon Exon<br>- + | Exon Intron<br>+ - | Exon Intron<br>- + | Exon Intergenic<br>+ - | Exon Intergenic<br>- + | Promoter<br>+ - | Promoter<br>- + | Intergenic |
|-----------------------------|-------------------|-------------------|--------------------|--------------------|----------------------|----------------------|------------------|------------------|--------------------|--------------------|------------------------|------------------------|-----------------|-----------------|------------|
| STD<br>RNA-seq<br>library 1 | 3202_1            | sequence count    | 675885             | 653835             | 353482               | 197559               | 104193           | 105737           | 0                  | 0                  | 4133                   | 3726                   | 6701            | 6577            | 914850     |
|                             |                   | % of total        | 22.33%             | 25.46%             | 13.76%               | 7.69%                | 4.06%            | 4.12%            | 0.00%              | 0.00%              | 0.16%                  | 0.15%                  | 0.26%           | 0.26%           | 35.62%     |
|                             |                   | % by orientation  | 59.06%             | 67.58%             | 30.89%               | 20.42%               | 9.10%            | 10.93%           | 0.00%              | 0.00%              | 0.36%                  | 0.39%                  | 0.59%           | 0.68%           | N/A        |
|                             |                   | % within location | 50.83%             | 49.17%             | 64.15%               | 35.85%               | 49.63%           | 50.37%           | -                  | -                  | 52.59%                 | 47.41%                 | 50.47%          | 49.53%          | 100%       |
| STD<br>RNA-seq<br>library 1 | 3202_2            | sequence count    | 730224             | 698710             | 373789               | 206692               | 114470           | 114714           | 0                  | 0                  | 4286                   | 3936                   | 7302            | 6895            | 977422     |
|                             |                   | % of total        | 22.55%             | 27.20%             | 14.55%               | 8.05%                | 4.46%            | 4.47%            | 0.00%              | 0.00%              | 0.17%                  | 0.15%                  | 0.28%           | 0.27%           | 38.06%     |
|                             |                   | % by orientation  | 59.36%             | 67.77%             | 30.39%               | 20.05%               | 9.31%            | 11.13%           | 0.00%              | 0.00%              | 0.35%                  | 0.38%                  | 0.59%           | 0.67%           | N/A        |
|                             |                   | % within location | 51.10%             | 48.90%             | 64.39%               | 35.61%               | 49.95%           | 50.05%           | -                  | -                  | 52.13%                 | 47.87%                 | 51.43%          | 48.57%          | 100%       |
| STD<br>RNA-seq<br>library 1 | 3202_3            | sequence count    | 732604             | 700157             | 372792               | 205842               | 114179           | 114939           | 0                  | 0                  | 4564                   | 4025                   | 7112            | 7126            | 973916     |
|                             |                   | % of total        | 22.63%             | 27.26%             | 14.51%               | 8.01%                | 4.45%            | 4.48%            | 0.00%              | 0.00%              | 0.18%                  | 0.16%                  | 0.28%           | 0.28%           | 37.92%     |
|                             |                   | % by orientation  | 59.50%             | 67.84%             | 30.28%               | 19.94%               | 9.27%            | 11.14%           | 0.00%              | 0.00%              | 0.37%                  | 0.39%                  | 0.58%           | 0.69%           | N/A        |
|                             |                   | % within location | 51.13%             | 48.87%             | 64.43%               | 35.57%               | 49.83%           | 50.17%           | -                  | -                  | 53.14%                 | 46.86%                 | 49.95%          | 50.05%          | 100%       |
| STD<br>RNA-seq<br>library 1 | 3202_5            | sequence count    | 723154             | 685887             | 362188               | 199917               | 113014           | 112991           | 0                  | 0                  | 4250                   | 3819                   | 7061            | 6986            | 948939     |
|                             |                   | % of total        | 22.83%             | 26.70%             | 14.10%               | 7.78%                | 4.40%            | 4.40%            | 0.00%              | 0.00%              | 0.17%                  | 0.15%                  | 0.27%           | 0.27%           | 36.95%     |
|                             |                   | % by orientation  | 59.78%             | 67.94%             | 29.94%               | 19.80%               | 9.34%            | 11.19%           | 0.00%              | 0.00%              | 0.35%                  | 0.38%                  | 0.58%           | 0.69%           | N/A        |
|                             |                   | % within location | 51.32%             | 48.68%             | 64.43%               | 35.57%               | 50.01%           | 49.99%           | -                  | -                  | 52.67%                 | 47.33%                 | 50.27%          | 49.73%          | 100%       |
| STD<br>RNA-seq<br>library 2 | 3202_6            | sequence count    | 935413             | 887241             | 188999               | 98435                | 174707           | 167323           | 0                  | 0                  | 2704                   | 2233                   | 3693            | 3549            | 348386     |
|                             |                   | % of total        | 33.26%             | 34.54%             | 7.36%                | 3.83%                | 6.80%            | 6.51%            | 0.00%              | 0.00%              | 0.11%                  | 0.09%                  | 0.14%           | 0.14%           | 13.56%     |
|                             |                   | % by orientation  | 71.65%             | 76.57%             | 14.48%               | 8.49%                | 13.38%           | 14.44%           | 0.00%              | 0.00%              | 0.21%                  | 0.19%                  | 0.28%           | 0.31%           | N/A        |
| STD<br>RNA-seq<br>library 2 | 3202_7            | sequence count    | 907102             | 858297             | 183118               | 94266                | 169591           | 162759           | 0                  | 0                  | 2672                   | 2183                   | 3442            | 3484            | 337614     |
|                             |                   | % of total        | 33.29%             | 33.42%             | 7.13%                | 3.67%                | 6.60%            | 6.34%            | 0.00%              | 0.00%              | 0.10%                  | 0.08%                  | 0.13%           | 0.14%           | 13.14%     |
|                             |                   | % by orientation  | 71.66%             | 76.57%             | 14.47%               | 8.41%                | 13.40%           | 14.52%           | 0.00%              | 0.00%              | 0.21%                  | 0.19%                  | 0.27%           | 0.31%           | N/A        |
| STD<br>RNA-seq<br>library 2 | 3202_8            | sequence count    | 866305             | 817218             | 174053               | 90311                | 161370           | 154596           | 0                  | 0                  | 2561                   | 2138                   | 3315            | 3212            | 322450     |
|                             |                   | % of total        | 33.35%             | 31.82%             | 6.78%                | 3.52%                | 6.28%            | 6.02%            | 0.00%              | 0.00%              | 0.10%                  | 0.08%                  | 0.13%           | 0.13%           | 12.55%     |
|                             |                   | % by orientation  | 71.74%             | 76.56%             | 14.41%               | 8.46%                | 13.36%           | 14.48%           | 0.00%              | 0.00%              | 0.21%                  | 0.20%                  | 0.27%           | 0.30%           | N/A        |
|                             | % within location | 51.46%            | 48.54%             | 65.84%             | 34.16%               | 51.07%               | 48.93%           | -                | -                  | 54.50%             | 45.50%                 | 50.79%                 | 49.21%          | 100%            |            |
